# Supplementary material for: Modeling the Interaction of Dodecylphosphocholine Micelles with the Anticoccidial Peptide PW2 Guided by NMR Data
Source: Molecules. 2013 Aug 20;18(8):10056–80. doi: 10.3390/molecules180810056 (PMC6270265; doi:10.3390/molecules180810056)
Supplement: Supplementary file 1 [file molecules-18-10056-s001.pdf]

## Supplementary Materials

**Figure S1.** Restrained MD simulation of PW2 in the presence of the pre-built DPC micelle. **(A)** Snapshot showing the hydrogen bonds between PW2 and DPC polar heads. Note that several DPC molecules interact with PW2 by hydrogen bond. In this figure we observe hydrogen bond with His 1 and Gln 5, the most prevalent and long-lived in the initial events of interaction. **(B)** PW2 interaction with the DPC micelle. The figure shows only the DPC aliphatic acyl chains and the peptide.

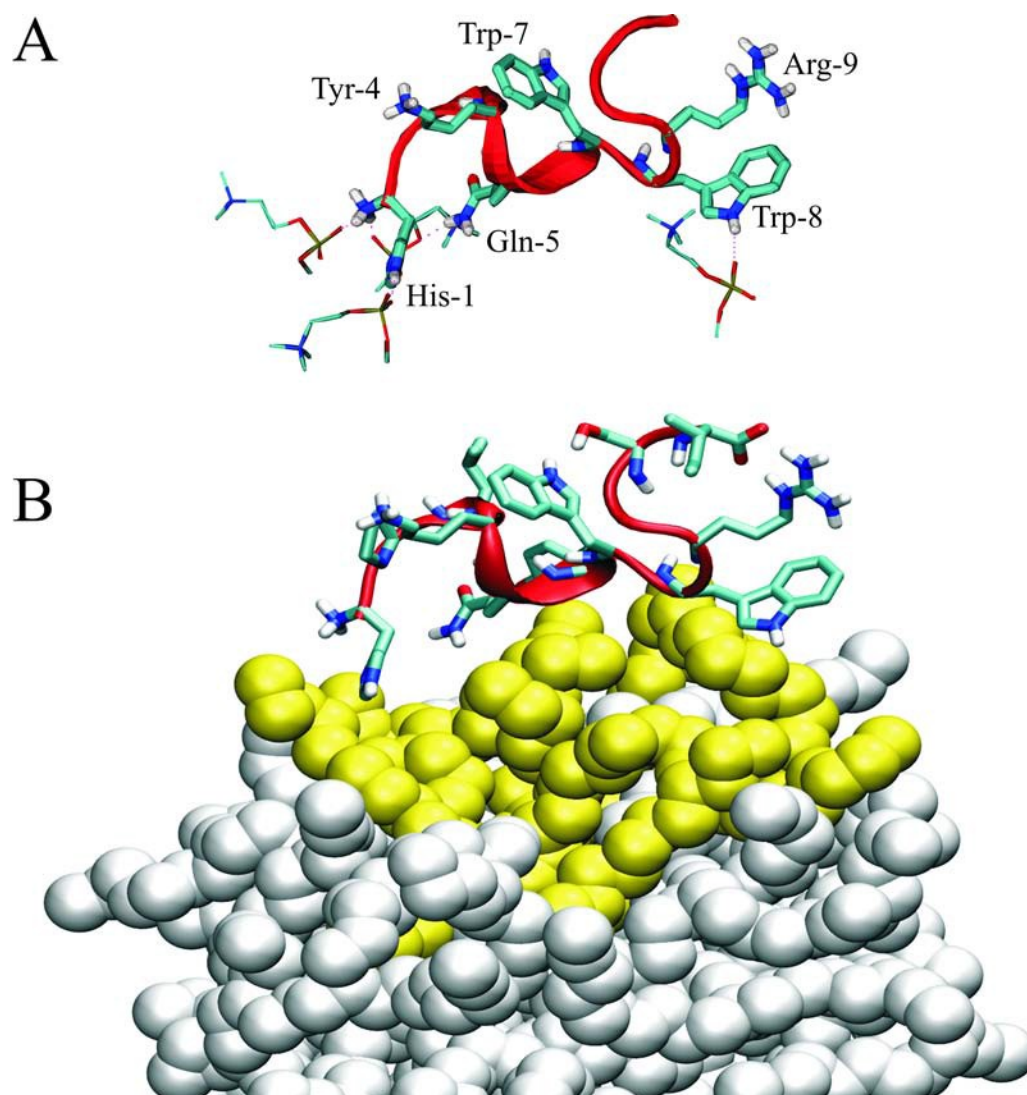

**Figure S2.** Restrained MD simulation of PW2 in the presence of DPC with free-DPC with spontaneous micelle formation. **(A)** Snapshot of a frame of the MD simulation of PW2 and the hydrogen bonded DPC polar head groups. **(B)** PW2 interaction with the DPC micelle. The figure shows only the DPC aliphatic acyl chains and the peptide. Note that PW2 is more deeply associated with the micelle.

**A**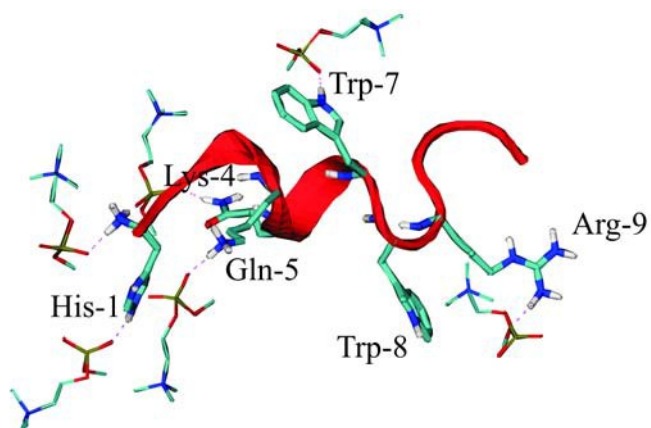**B**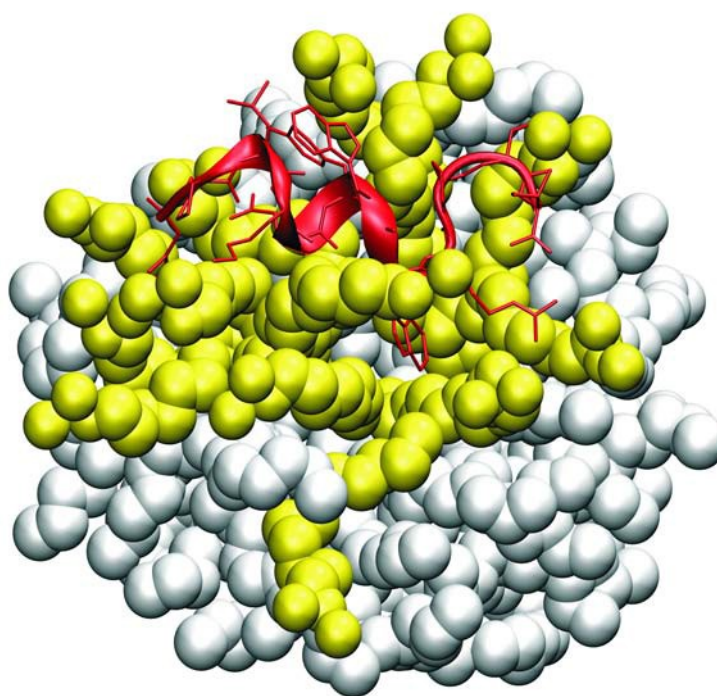

**Figure S3.** Unrestrained MD simulation of PW2 in the presence of free-DPC with spontaneous micelle formation. **(A)** Snapshot of a frame of the MD simulation of PW2 and the hydrogen bonded DPC polar head groups. Note that PW2 is sandwiched in two micelle interface, forming a network of hydrogen bonds. **(B)** PW2 interaction with the Note that PW2 is more deeply associated with the micelle.

**A**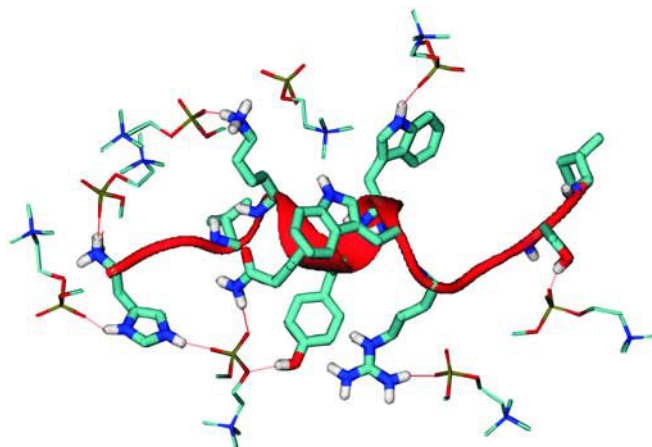**B**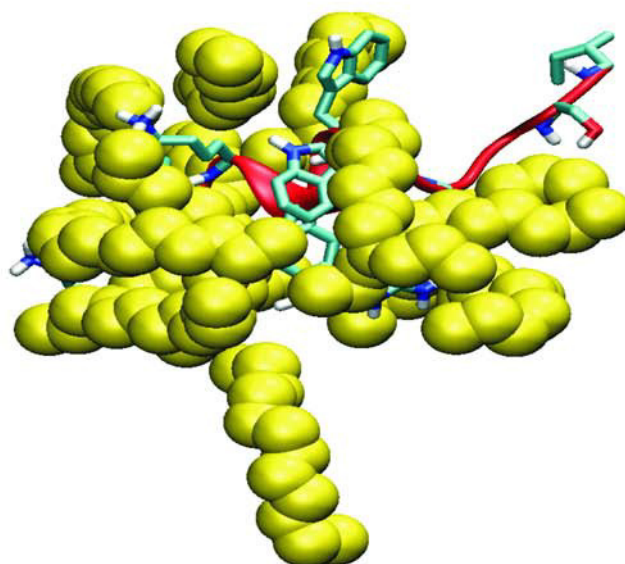

**Figure S4.** PW2 interaction with the solvent.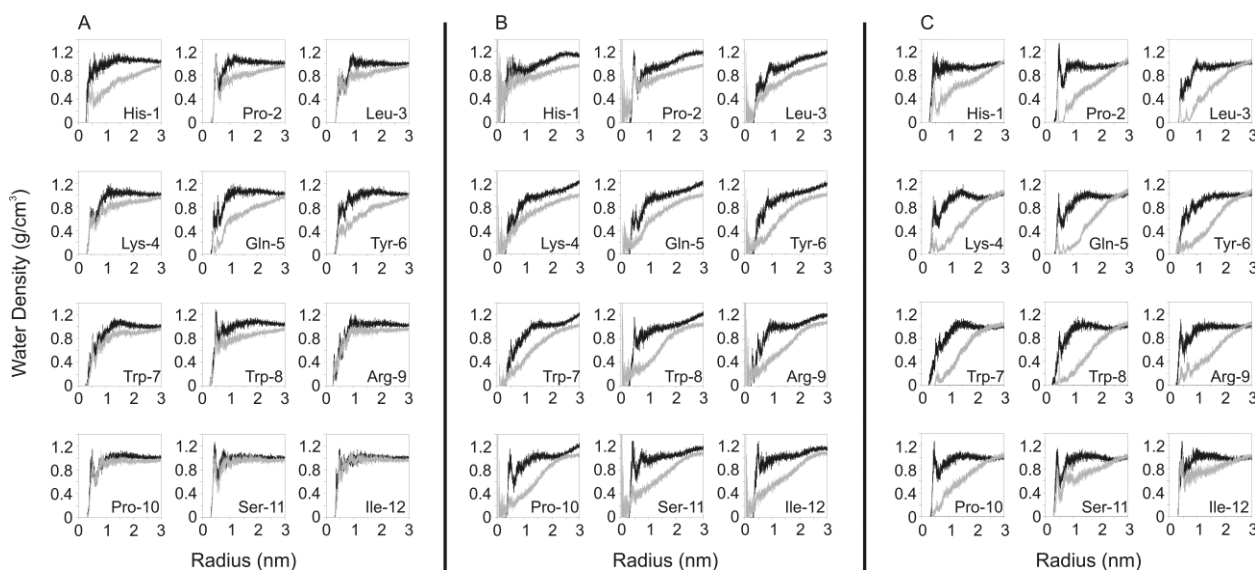

Water density profile,  $g(r)$ , generated using the GROMACS “g\_rdf” module for each amino acid side chain for the 1st nanosecond of the simulation (black) and last nanosecond of the simulation (grey). Note that the water exposure in the last nanosecond is always smaller than in the first nanosecond. To calculate the water exposure for each residues (Figure 7), the area below the curve  $g(r)$  was integrated for the range 0-2 nm for the first (black) and last nanosecond of MD simulations (grey). The ratio between the last and initial nanosecond was used as a measure of the relative water exposure and was plotted as a function of the amino acid side chain (Figure 7). “A” refers to the MD simulation in the presence of pre-built DPC micelles, “B” in the presence of free-DPC with spontaneous micelle formation (restrained) and “C” in the presence of free-DPC with spontaneous micelle formation (unrestrained).

Table S1 is linked with Figure 5b,c. The raw data used to build Figure 5 is expressed as function of TOCSY cross-peak assignment. The data was sorted according the residue number and atom names (columns 2 and 3), from N- to C-terminal, receiving a numerical index (column 1, from 1 to 114). The ratio between the TOCSY cross-peaks intensity in absence and the presence of  $Mn^{2+}$  is showed in column 4 ( $I_0/I_{Mn^{2+}}$ ). The ratio between the TOCSY crosspeaks intensity in the presence of  $Mn^{2+}$ , Mn-EDTA complex is showed in column 5 ( $I_0/I_{EDTA-Mn^{2+}}$ ).

**Table S1.** Interaction of the PW2 with DPC micelles.

|    | Crosspeak Assignment |      | $[I_0/I_{Mn^{2+}}]$ | $[I_0/I_{EDTA-Mn^{2+}}]$ |
|----|----------------------|------|---------------------|--------------------------|
| 1  | 1HE1                 | 1HD2 | 0.28                | 0                        |
| 2  | 2HB                  | 2HG+ | 0.72                | 0.07                     |
| 3  | 2HB+                 | 2HG+ | 0.51                | 0.02                     |
| 4  | 2HB1                 | 2HD1 | 0.61                | 0.01                     |
| 5  | 2HB1                 | 2HD2 | 0.61                | 0                        |
| 6  | 2HB1                 | 2HA  | 0.55                | 0                        |
| 7  | 2HD1                 | 2HB1 | 0.03                | −0.03                    |
| 8  | 2HD1                 | 2HG1 | 0.71                | 0.01                     |
| 9  | 2HD1                 | 2HG2 | 0.55                | 0.11                     |
| 10 | 2HD2                 | 2HD1 | 0.68                | −0.02                    |
| 11 | 2HD2                 | 2HG2 | 0.67                | −0.01                    |

Table S1. Cont.

|    | Crosspeak Assignment |       | $[I_0/I_{Mn^{2+}}]$ | $[I_0/I_{EDTA-Mn^{2+}}]$ |
|----|----------------------|-------|---------------------|--------------------------|
| 12 | 2HD2                 | 2HD1  | 0.64                | 0.01                     |
| 13 | 2HD2                 | 2HB1  | 0.63                | −0.03                    |
| 14 | 2HD2                 | 2HG1  | 0.68                | −0.02                    |
| 15 | 2HG1                 | 2HB1  | 0.69                | 0.01                     |
| 16 | 2HG1                 | 2HG2  | 0.63                | 0                        |
| 17 | 2HG2                 | 2HB1  | 0.66                | 0.04                     |
| 18 | 3HB1                 | 3HD+  | 0.58                | 0.12                     |
| 19 | 3HB1                 | 3HG   | 0.67                | 0.07                     |
| 20 | 3HG                  | 3HD+  | 0.54                | 0.09                     |
| 21 | 3HG                  | 3HB1  | 0.63                | 0.12                     |
| 22 | 3HN                  | 3HA   | 0.59                | −0.01                    |
| 23 | 3HN                  | 3HA   | 0.53                | −0.03                    |
| 24 | 3HN                  | 3HA   | 0.53                | −0.01                    |
| 25 | 3HN                  | 3HB+  | 0.22                | −0.04                    |
| 26 | 3HN                  | 3HB+  | 0.55                | 0                        |
| 27 | 3HN                  | 3HB+  | 0.00                |                          |
| 28 | 3HN                  | 3HB+  | 0.00                |                          |
| 29 | 4HA                  | 4HG+  | 0.56                | −0.05                    |
| 30 | 4HA                  | 4HB#  | 0.57                | 0.01                     |
| 31 | 4HB1                 | 4HG1  | 0.56                | 0.06                     |
| 32 | 4HE1                 | 4HG1  | 0.53                | 0.04                     |
| 33 | 4HE1                 | 4HD1  | 0.52                | 0.03                     |
| 34 | 4HN                  | 4HA   | 0.47                | 0.02                     |
| 35 | 4HN                  | 4HB2  | 0.42                | −0.04                    |
| 36 | 4HN                  | 4HG1  | 0.5                 | 0.02                     |
| 37 | 4HZ                  | 4HG1  | 1.38                | −0.14                    |
| 38 | 4HZ                  | 4HE2  | 0.43                | 0.12                     |
| 39 | 4HZ                  | 4HD2  | 0.33                | 0.15                     |
| 40 | 5HA                  | 5HB+  | 0.15                | 0.06                     |
| 41 | 5HA                  | 5HG+  | 0.32                | 0.14                     |
| 42 |                      |       |                     |                          |
| 43 | 5HE11                | 5HE21 | 0.04                | 0.02                     |
| 44 | 5HE21                | 5HE22 | 0.04                | 0.02                     |
| 45 | 5HN                  | 5HB1  | 0.18                | −0.01                    |
| 46 | 5HN                  | 5HG1  | 0.16                | −0.12                    |
| 47 | 5HN                  | 5HA   | 0.23                | 0.02                     |
| 48 |                      |       |                     |                          |
| 49 |                      |       |                     |                          |
| 50 | 6HD1                 | 6HE1  | 0.26                | 0.2                      |
| 51 | 6HE1                 | 6HD1  | 0.26                | 0.22                     |
| 52 | 6HN                  | 6HB1  | 0.23                | 0.28                     |
| 53 | 6HN                  | 6HA   | 0.22                | 0.3                      |
| 54 | 7H                   | 7H    | 0.05                | 0.79                     |
| 55 | 7HB1                 | 7HA   | 0.12                | 0.47                     |
| 56 | 7HE1                 | 7HE1  | 0.01                | 0.09                     |
| 57 | 7HE3                 | 7HZ3  | 0.28                | 0.86                     |
| 58 | 7HE3                 | 7HH2  | 0.26                | 0.95                     |

Table S1. Cont.

|     | Crosspeak Assignment |       | $[I_0/I_{Mn^{2+}}]$ | $[I_0/I_{EDTA-Mn^{2+}}]$ |
|-----|----------------------|-------|---------------------|--------------------------|
| 59  | 7HH2                 | 7HZ3  | 0.34                | 0.68                     |
| 60  | 7HH2                 | 7HZ3  | 0.06                | 0.76                     |
| 61  |                      |       |                     |                          |
| 62  | 7HN                  | 7HB+  | 0.02                | 0.01                     |
| 63  | 7HN                  | 7HA   | 0.09                | 0.05                     |
| 64  | 7HZ2                 | 7HZ3  | 0.23                | 0.65                     |
| 65  | 7HZ2                 | 7HH2  | 0.16                | 0.68                     |
| 66  | 7HZ3                 | 7HH2  | 0.29                | 0.74                     |
| 67  |                      |       |                     |                          |
| 68  | 8HB1                 | 8HA   | 0                   | −0.02                    |
| 69  | 8HE1                 | 8HE1  | 0                   | 0.08                     |
| 70  | 8HH2                 | 8HZ3  | 0.12                | 0.51                     |
| 71  | 8HH2                 | 8HZ2  | 0.23                | 0.34                     |
| 72  | 8HN                  | 8HA   | 0.11                | −0.01                    |
| 73  | 8HZ2                 | 8HH2  | 0.02                | 0.22                     |
| 74  | 8HZ2                 | 8HH2  | 0.26                | 0.11                     |
| 75  | 8HZ2                 | 8HZ3  | 0.27                | 0.27                     |
| 76  | 8HZ3                 | 8HZ2  | 0.3                 | 0.61                     |
| 77  | 8HZ3                 | 8HH2  | 0.15                | 0.71                     |
| 78  | 9HE                  | 9HB+  | 0                   | 0.34                     |
| 79  | 9HE                  | 9HG+  | 0.26                | −0.04                    |
| 80  | 9HE                  | 9HG   | 0.3                 | 0.42                     |
| 81  | 9HE                  | 9HB+  | 0.31                | 0.46                     |
| 82  | 9HN                  | 9HE   | 0.17                | 0.13                     |
| 83  | 9HN                  | 9HB+  | −0.04               | 0.24                     |
| 84  | 9HN                  | 9HG+  | 0.13                | 0.14                     |
| 85  | 9HN                  | 9HA   | 0.12                | 0                        |
| 86  | 10HB1                | 10HG1 | 0.07                | 0.2                      |
| 87  | 10HB1                | 10HD1 | 0.04                | 0.57                     |
| 88  | 10HB1                | 10HA  | 0                   | 0.49                     |
| 89  | 10HD1                | 10HG1 | 0.06                | 0.53                     |
| 90  | 10HD1                | 10HB1 | 0.02                | 0.47                     |
| 91  | 10HD1                | 10HD2 | 0.09                | 0.66                     |
| 92  | 10HD2                | 2HG2  | 0.28                | 0.46                     |
| 93  | 10HD2                | 10HG2 | 0.12                | 0.39                     |
| 94  | 10HD2                | 10HB1 | 0.06                | 0.51                     |
| 95  | 10HD2                | 10HG2 | −0.04               | 0.45                     |
| 96  | 10HD2                | 10HD1 | 0.07                | 0.56                     |
| 97  | 10HG1                | 10HD1 | 0.26                | 0.63                     |
| 98  | 11HA                 | 11HB# | 0.08                | −0.24                    |
| 99  | 11HB1                | 11HA  | 0.01                | 0.28                     |
| 100 | 11HB1                | 11HA  | 0.01                | 0.27                     |
| 101 | 11HN                 | 11HB1 | 0                   | 0.18                     |
| 102 | 11HN                 | 11HA  | 0                   | 0.28                     |
| 103 | 12HA                 | 12HD1 | 0.02                | 0.02                     |
| 104 | 12HA                 | 12HD1 | −0.09               | −0.11                    |
| 105 | 12HA                 | 12HB  | 0.02                | 0.04                     |

**Table S1.** *Cont.*

|     | Crosspeak Assignment |        | $[I_0/I_{Mn^{2+}}]$ | $[I_0/I_{EDTA-Mn^{2+}}]$ |
|-----|----------------------|--------|---------------------|--------------------------|
| 106 | 12HB                 | 12HG2  | 0                   | 0.4                      |
| 107 | 12HB                 | 12HG12 | 0                   | 0.27                     |
| 108 | 12HB                 | 12HG11 | 0.07                | 0.12                     |
| 109 | 12HG11               | 12HG12 | 0.07                | 1.11                     |
| 110 | 12HG12               | 12HG11 | 0.08                | 0.09                     |
| 111 | 12HN                 | 12HA   | 0                   | 0.34                     |
| 112 | 12HN                 | 12HD+  | 0.05                | 0.22                     |
| 113 | 12HN                 | 12HG+  | −0.11               | −0.41                    |
| 114 | 12HN                 | 12HB   | 0.04                | 0.3                      |
